# Supplementary material for: Antioxidant Properties and Geroprotective Potential of Wheat Bran Extracts with Increased Content of Anthocyanins
Source: MDPI journal article supplement (doi:10.3390/antiox12112010), 2023-11-17
Supplement: s1 [file s1]

**Table S1.** Retention time, concentration and molecular ion of major and minor anthocyanins in the extraction mixture.

| Anthocyanins           | Retention time,<br>min | Peak area | Concentration,<br>mg/ml | m/z    |
|------------------------|------------------------|-----------|-------------------------|--------|
| Major components       |                        |           |                         |        |
| Cyanidin glucoside     | 2.96                   | 54092     | 0.054                   | 486.21 |
| Cyanidin arabinoside   | 6.60                   | 57480     | 0.057                   | 426.33 |
| Minor components       |                        |           |                         |        |
| Cyanidin galactoside   | 2.23                   | 3611      | 0.0036                  | 485.96 |
| Pelargonidin glucoside | 4.58                   | 5613      | 0.0056                  | 450.03 |
| Malvidin glucoside     | 7.92                   | 6067      | 0.0060                  | 510.42 |
