# Supplementary figures and images for: Antioxidant Properties and Geroprotective Potential of Wheat Bran Extracts with Increased Content of Anthocyanins
Source: MDPI journal article supplement (doi:10.3390/antiox12112010), 2023-11-17

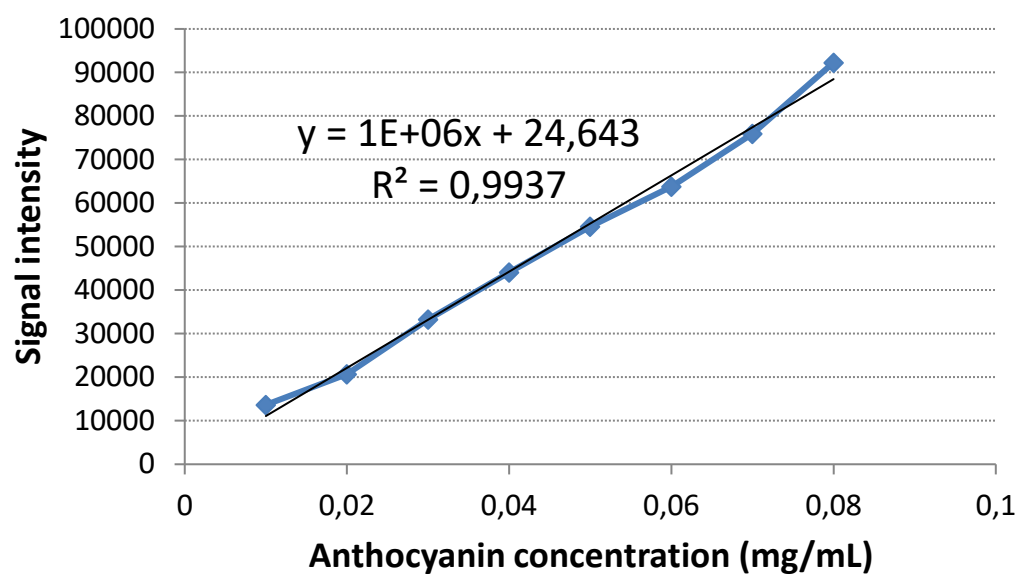

**Figure S1.** Calibration graph of cyanidin glucoside.

Supplement: s1 [file s1]
